# Supplementary material for: Positive and negative nano-electrospray mass spectrometry of ruthenated serum albumin supported by docking studies: an integrated approach towards defining metallodrug binding sites on proteins
Source: Royal Society of Chemistry journal article supplement (doi:10.1039/c7mt00330g), 2018-01-01
Supplement: c7mt00330g1.pdf [file c7mt00330g1.pdf]

## Supporting Information

### **Positive and negative nano-electrospray mass spectrometry of ruthenated serum albumin supported by docking studies: an integrated approach towards defining metallodrug binding sites on proteins**

Marija Nišavić<sup>a</sup>, Goran Janjić<sup>b</sup>, Amela Hozic<sup>c</sup>, Marijana Petković<sup>a</sup>, Zoran Vujčić<sup>d</sup>, Miloš Milčić<sup>d</sup>, and Mario Cindrić<sup>c\*</sup>

<sup>a</sup>Department of Physical Chemistry, “Vinča” Institute of Nuclear Sciences, University of Belgrade, Mike Petrovića Alasa 12-14, 11000 Belgrade, Serbia

<sup>b</sup>Institute of Chemistry, Technology and Metallurgy, University of Belgrade, Njegoseva 12, 11000 Belgrade, Serbia

<sup>c</sup>Centre for Proteomics and Mass Spectrometry, Division of Molecular Medicine, Ruđer Bošković Institute, Bijenička cesta 54, 10000 Zagreb, Croatia

<sup>d</sup>Faculty of Chemistry, University of Belgrade, Studentski trg 12-14, 11000 Belgrade, Serbia

*\*Correspondence to: mario.cindric@irb.hr*

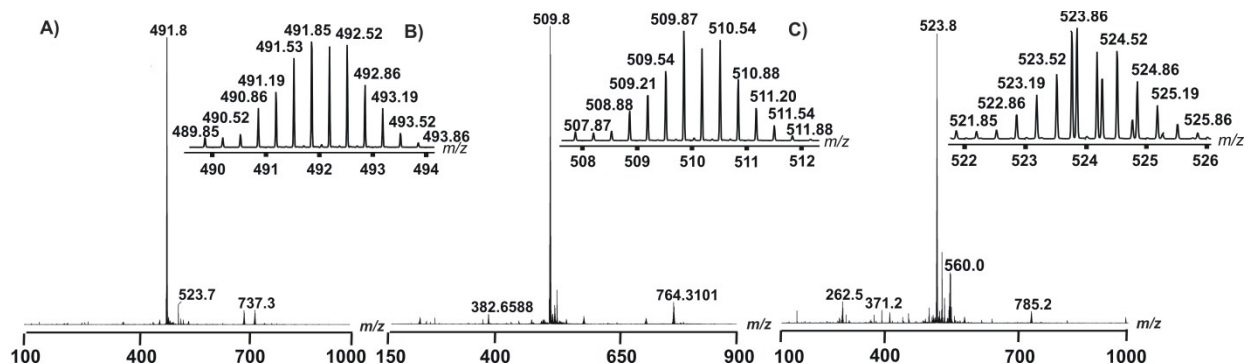

**Fig. S1.** Positive ion mode ESI MS spectra of angiotensin II adducts with compounds  $[Ru(Cl-tpy)(en)Cl]^+$  (A),  $[Ru(Cl-tpy)(dach)Cl]^+$  (B) and  $[Ru(Cl-tpy)(bipy)Cl]^+$  (C). Inset in each spectrum shows isotopic distribution of triply charged ruthenated peptide. Additional peaks at  $m/z$  737.3, 764.3 and 785.2 for compounds en, dach and bipy, respectively, correspond to doubly charged ruthenated angiotensin II.

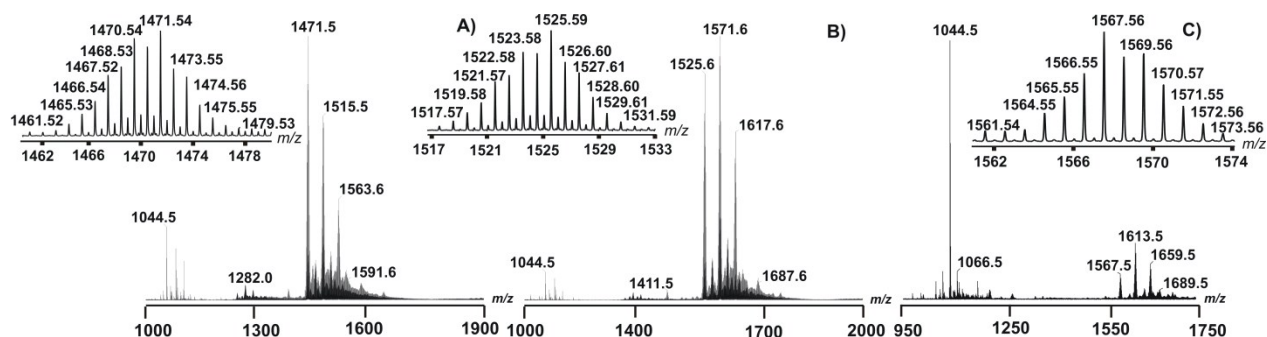

**Fig. S2.** Negative ion mode ESI MS spectra of angiotensin II adducts with compounds  $[Ru(Cl-tpy)(en)Cl]^+$  (A),  $[Ru(Cl-tpy)(dach)Cl]^+$  (B) and  $[Ru(Cl-tpy)(bipy)Cl]^+$  (C). Inset in each spectrum shows isotopic distribution of singly charged ruthenated peptide. Two subsequent peaks in each spectrum (at  $m/z$  1515.5 and 1563.6 for en compound, 1571.6 and 1617.6 for dach and 1613.5 and 1659.5 for bipy compound) represent mono- and di-formic acid adducts. Signal at 1044.5 in each spectrum correspond to free angiotensin II.

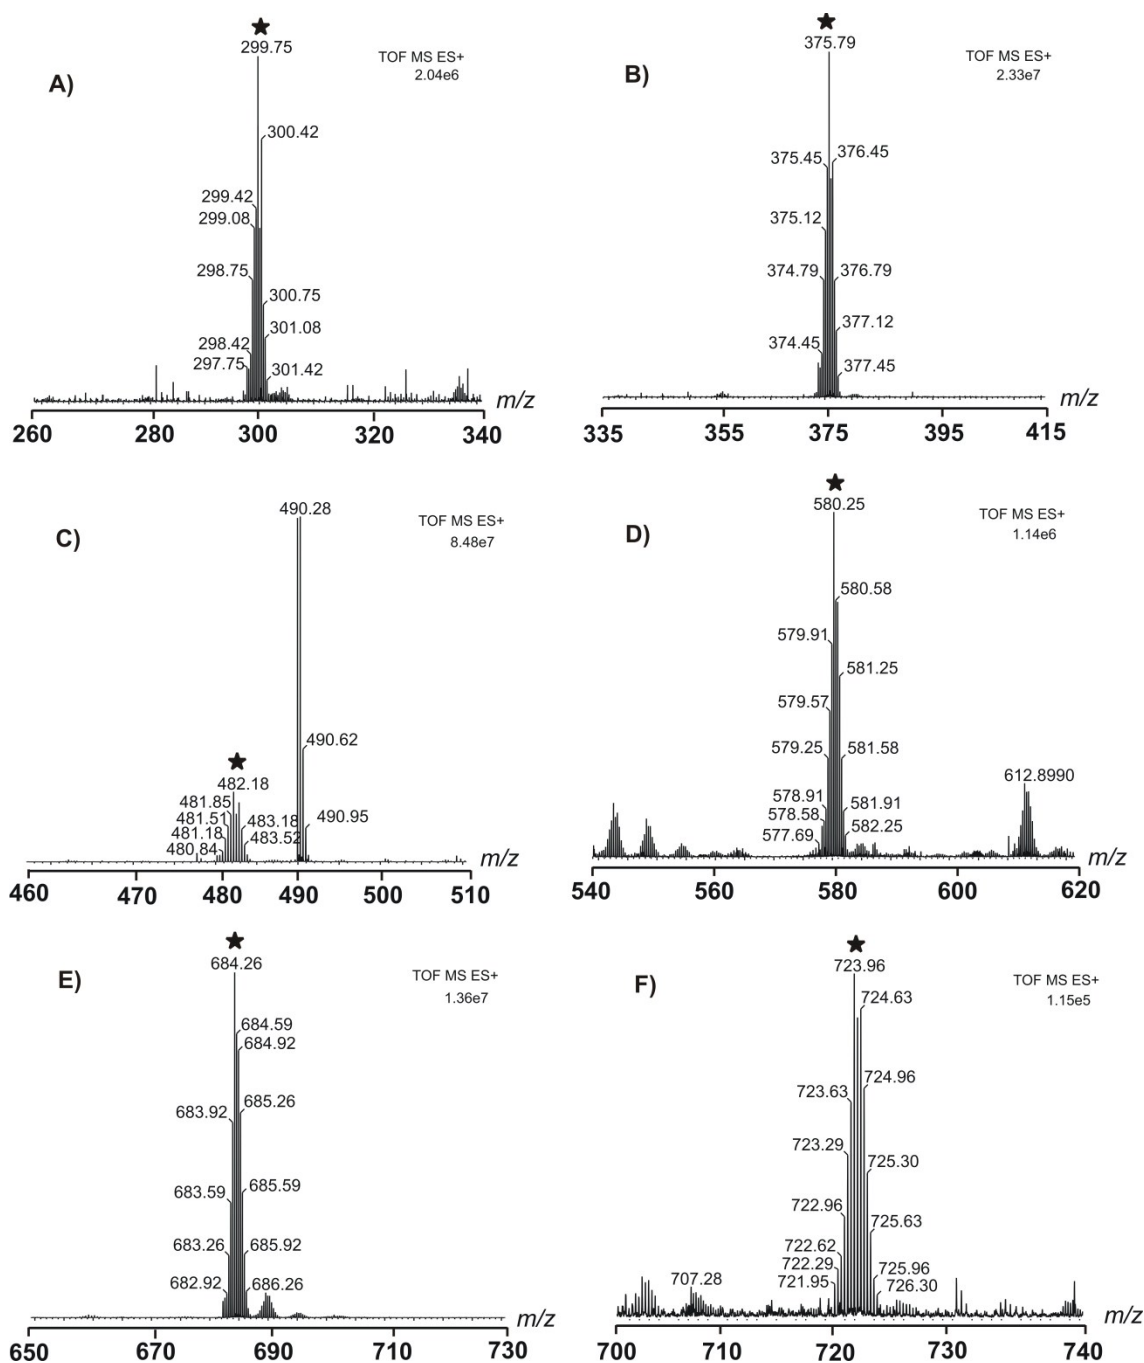

**Fig. S3.** Enlarged positive ion mode LE MS<sup>E</sup> spectra showing [Ru(Cl-tpy)(en)]-bound HSA sequences: DAHK (A), SEVAHR (B), SLHTLFGDK (C), HPDYSVLLLLR (D), DVFLGMFLYEYAR (E) and HPYFYAPELLFFAK (F). Target sequences are marked with a black asterisk in each spectrum.

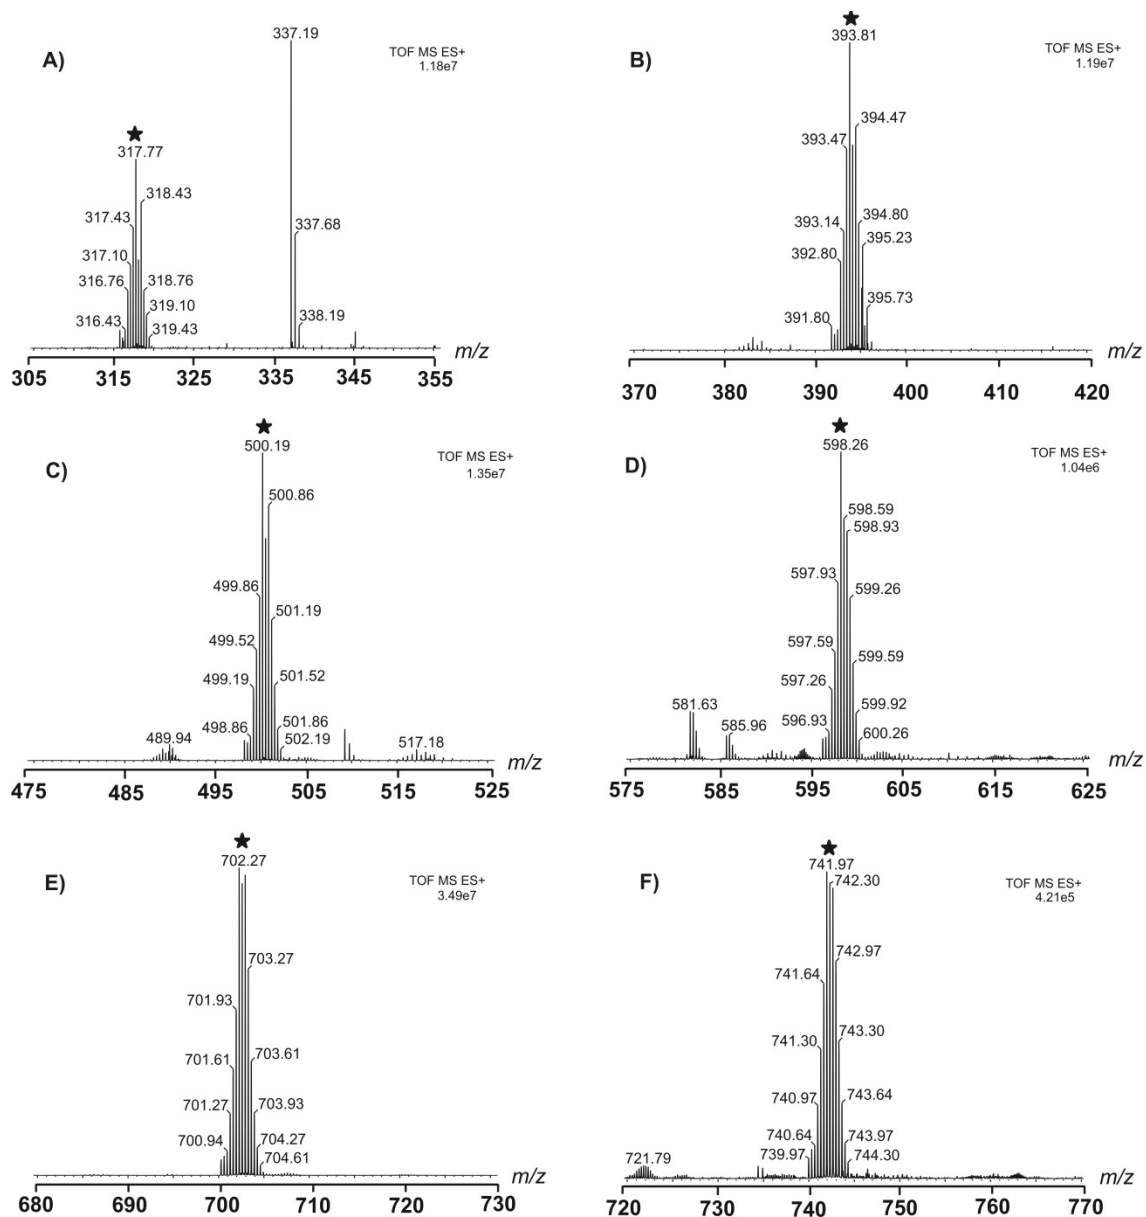

**Fig. S4.** Enlarged positive ion mode LE MS<sup>E</sup> spectra showing [Ru(Cl-tpy)(dach)]-bound HSA sequences: DAHK (A), SEVAHR (B), SLHTLFGDK (C), HPDYSVLLLR (D), DVFLGMFLYEYAR (E) and HPYFYAPELLFFAK (F). Target sequences are marked with a black asterisk in each spectrum.

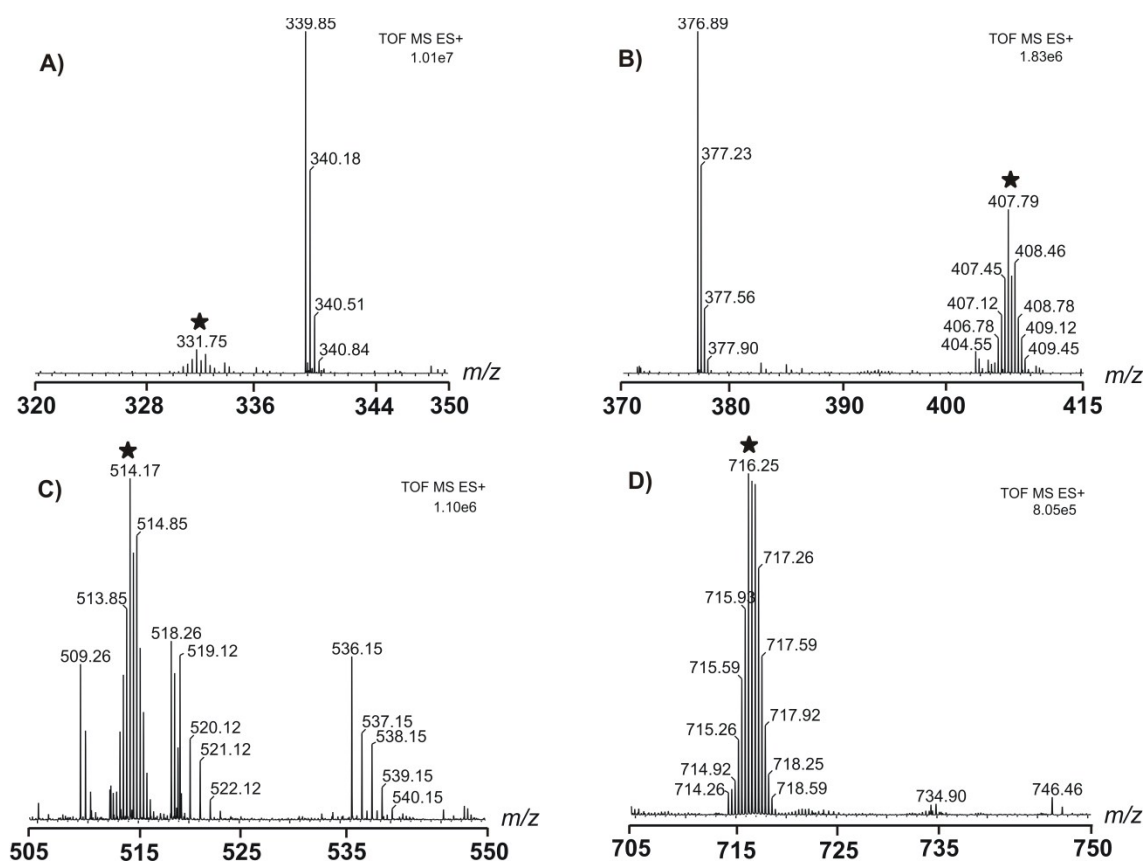

**Fig. S5.** Enlarged positive ion mode LE MS<sup>E</sup> spectra showing [Ru(Cl-tpy)(bipy)]-bound HSA sequences: DAHK (A), SEVAHR (B), SLHTLFGDK (C) and DVFLGMFLYEYAR (D). Target sequences are marked with a black asterisk in each spectrum.

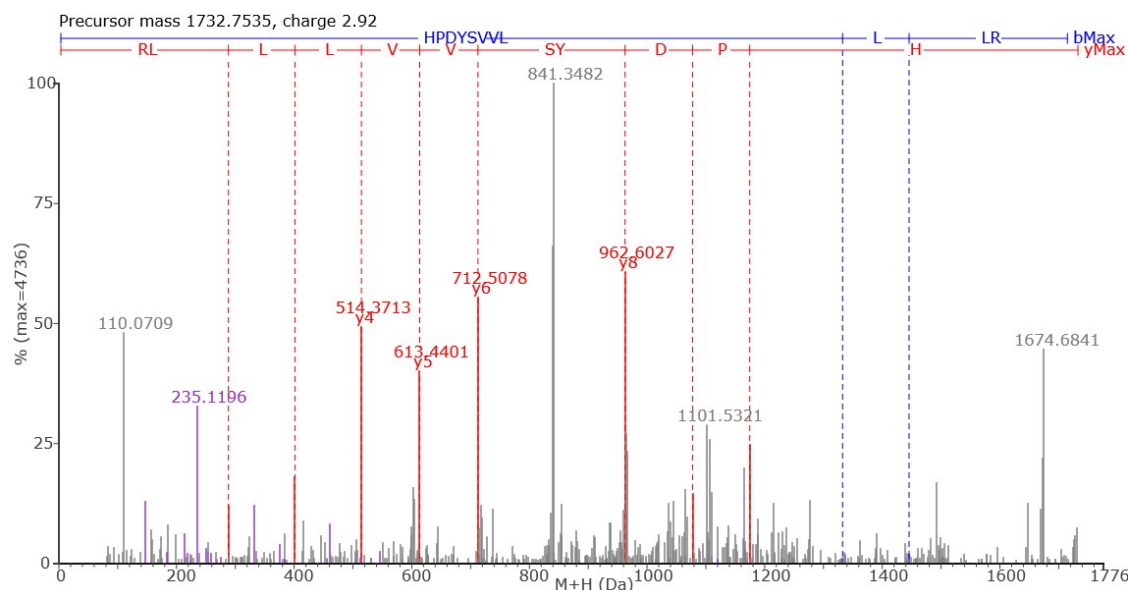

**Fig. S6.** PLGS generated HE MS<sup>E</sup> spectrum of <sup>338</sup>HPDYSVLLLR<sup>348</sup> HSA sequence adduct with compound [Ru(Cl-tpy)(en)Cl]<sup>+</sup>. The identified precursor is triply positively charged ion with a mass of 1732 Da. The identified mass corresponds to the peptide adduct with compound [Ru(Cl-tpy)(en)Cl]<sup>+</sup>, after Cl ligand hydrolysis.

**Table S1.** PLGS software identified HE MS<sup>E</sup> peptide fragment ions. marks neutral loss (H<sub>2</sub>O, NH<sub>3</sub>).

| Peptide sequence                             | Number of ions | Fragment ion identity                                                                                                                                                                                                        |
|----------------------------------------------|----------------|------------------------------------------------------------------------------------------------------------------------------------------------------------------------------------------------------------------------------|
| <sup>5</sup> SEVAHR <sup>10</sup>            | 12             | b <sub>2</sub> , b <sub>3</sub> , b <sub>3</sub> , b <sub>4</sub> , b <sub>4</sub> , b <sub>5</sub> , y <sub>2</sub> , y <sub>3</sub> , y <sub>4</sub> , y <sub>5</sub> , y <sub>5</sub> , y <sub>6</sub>                    |
| <sup>65</sup> SLHTLFGDK <sup>73</sup>        | 9              | y <sub>2</sub> , y <sub>2</sub> , y <sub>3</sub> , y <sub>3</sub> , y <sub>4</sub> , y <sub>5</sub> , y <sub>6</sub> , y <sub>7</sub> , y <sub>7</sub>                                                                       |
| <sup>146</sup> HPYFYAPELLFFAK <sup>159</sup> | 10             | b <sub>10</sub> , y <sub>2</sub> , y <sub>3</sub> , y <sub>4</sub> , y <sub>6</sub> , y <sub>7</sub> , y <sub>8</sub> , y <sub>12</sub> , y <sub>13</sub> , y <sub>14</sub>                                                  |
| <sup>324</sup> DVFLGMFLYEYAR <sup>336</sup>  | 7              | b <sub>1</sub> , b <sub>11</sub> , y <sub>8</sub> , y <sub>9</sub> , y <sub>10</sub> , y <sub>11</sub> , y <sub>12</sub>                                                                                                     |
| <sup>338</sup> HPDYSVLLLR <sup>348</sup>     | 13             | b <sub>2</sub> , b <sub>5</sub> , y <sub>2</sub> , y <sub>3</sub> , y <sub>4</sub> , y <sub>5</sub> , y <sub>6</sub> , y <sub>7</sub> , y <sub>8</sub> , y <sub>8</sub> , y <sub>9</sub> , y <sub>10</sub> , y <sub>11</sub> |

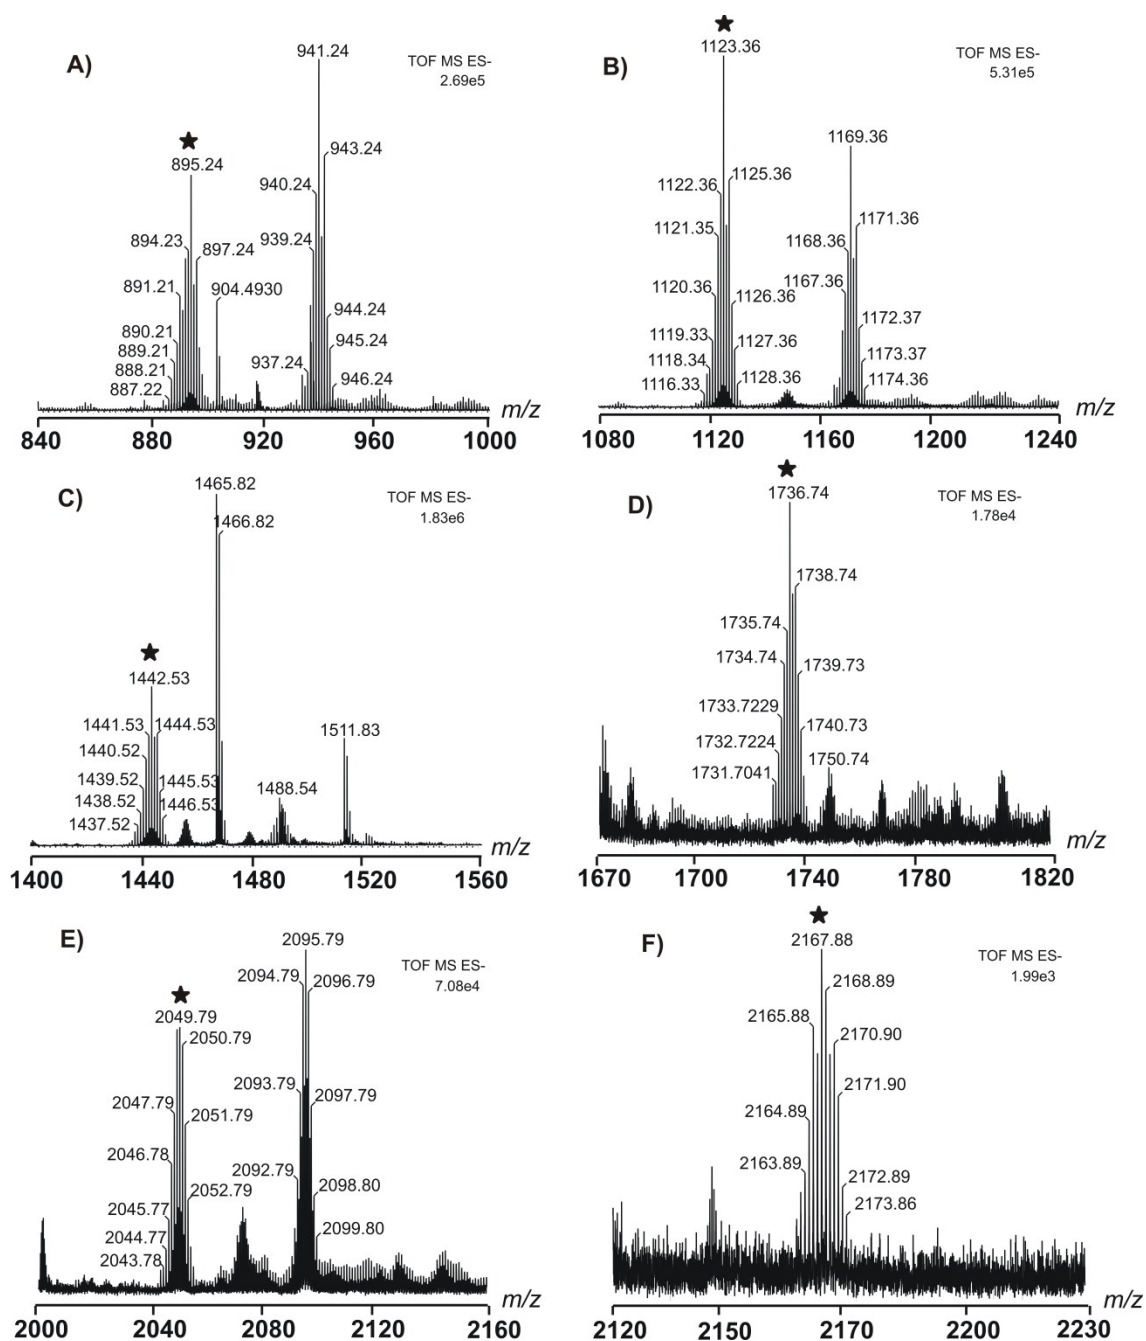

**Fig. S7.** Enlarged negative ion mode LE MS<sup>E</sup> spectra showing [Ru(Cl-tpy)(en)]-bound HSA sequences: DAHK (A), SEVAHR (B), SLHTLFGDK (C), HPDYSVLLLR (D), DVFLGMFLYEYAR (E) and HPYFYAPELLFFAK (F). Target sequences are marked with a black asterisk in each spectrum.

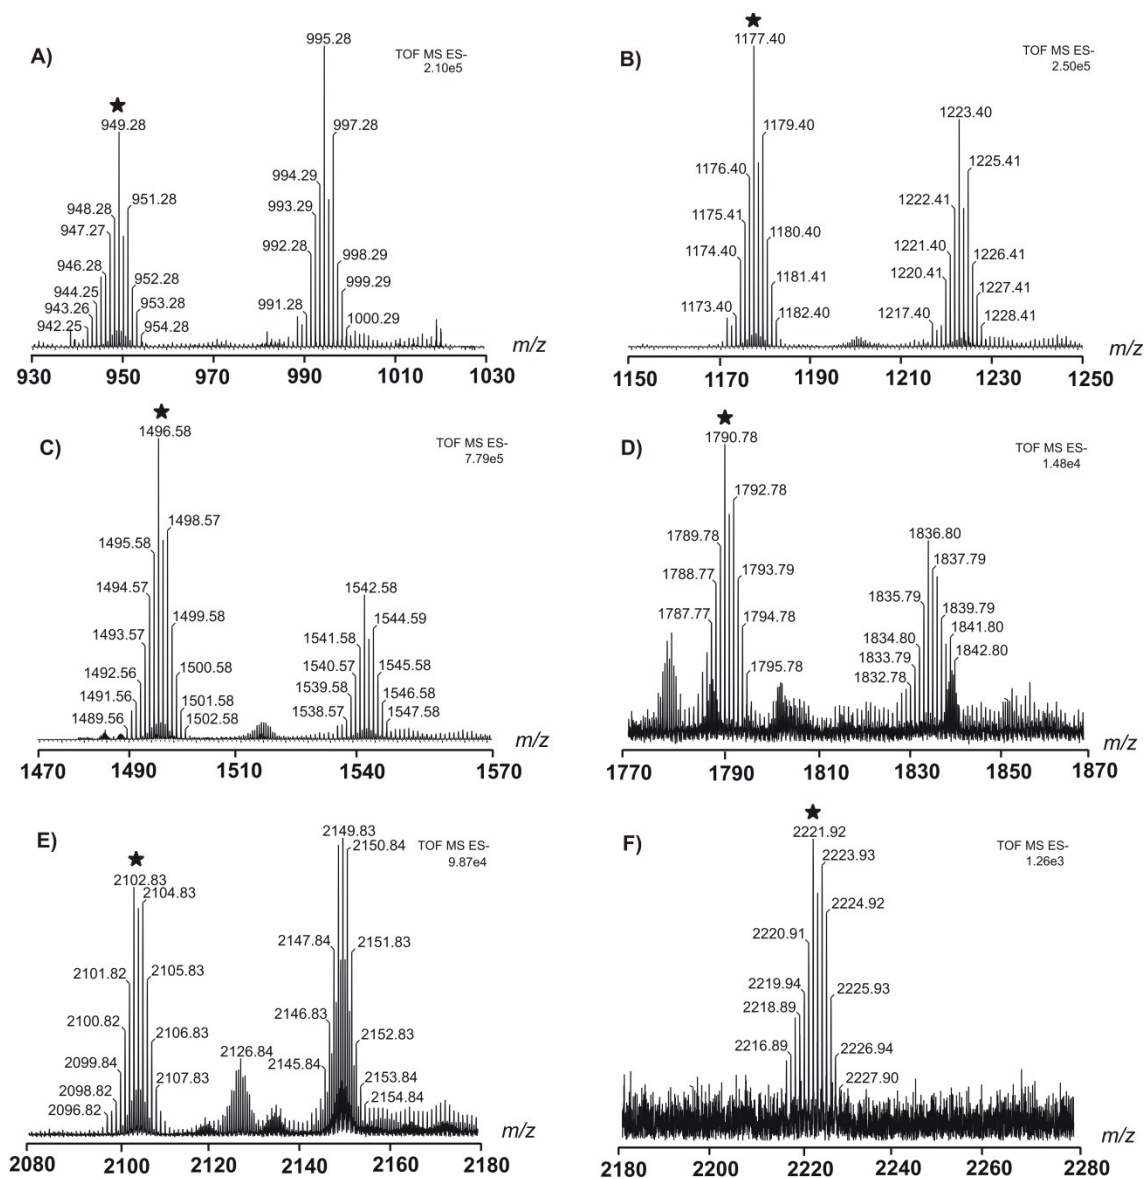

**Fig. S8.** Enlarged negative ion mode LE MS<sup>E</sup> spectra showing [Ru(Cl-tpy)(dach)]-bound HSA sequences: DAHK (A), SEVAHR (B), SLHTLFGDK (C), HPDYSVLLLR (D), DVFLGMFLYEYAR (E) and HPYFYAPELLFFAK (F). Target sequences are marked with a black asterisk in each spectrum.



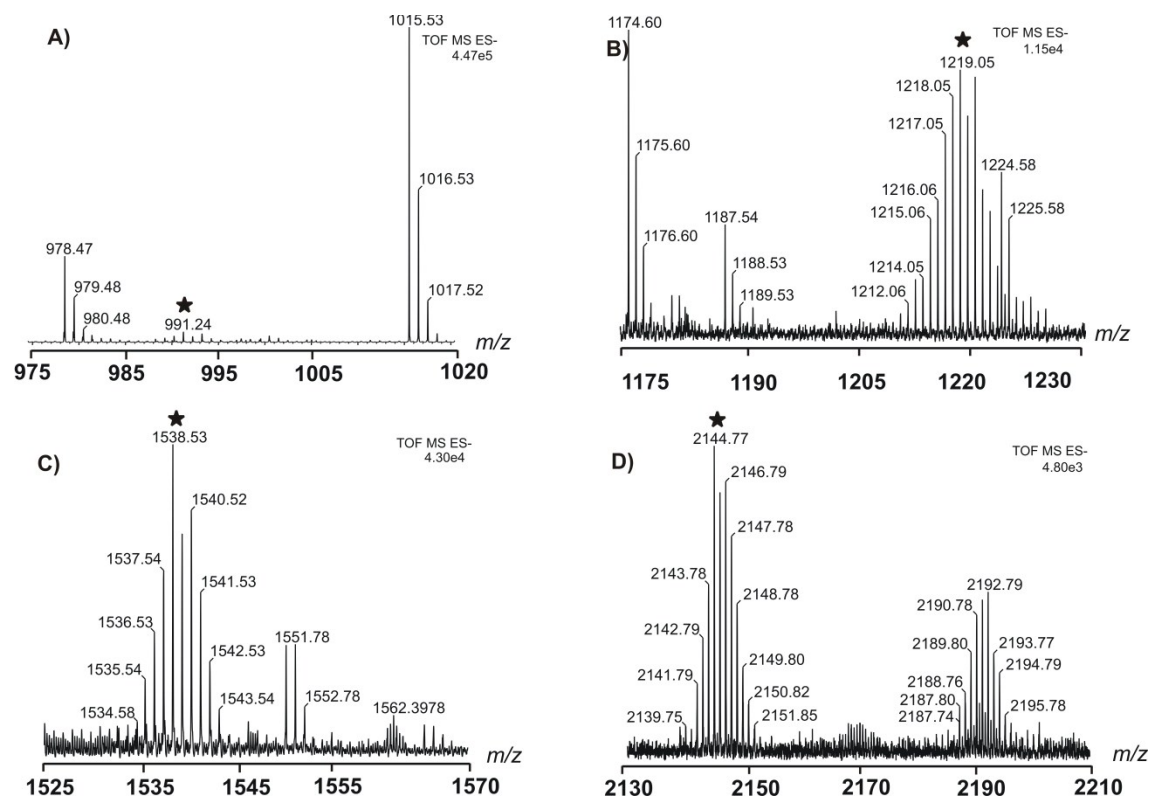

**Fig. S9.** Enlarged negative ion mode LE MS<sup>E</sup> spectra showing [Ru(Cl-tpy)(dach)]-bound HSA sequences: DAHK (A), SEVAHR (B), SLHTLFGDK (C) and DVFLGMFLYEYAR (D). Target sequences are marked with a black asterisk in each spectrum.

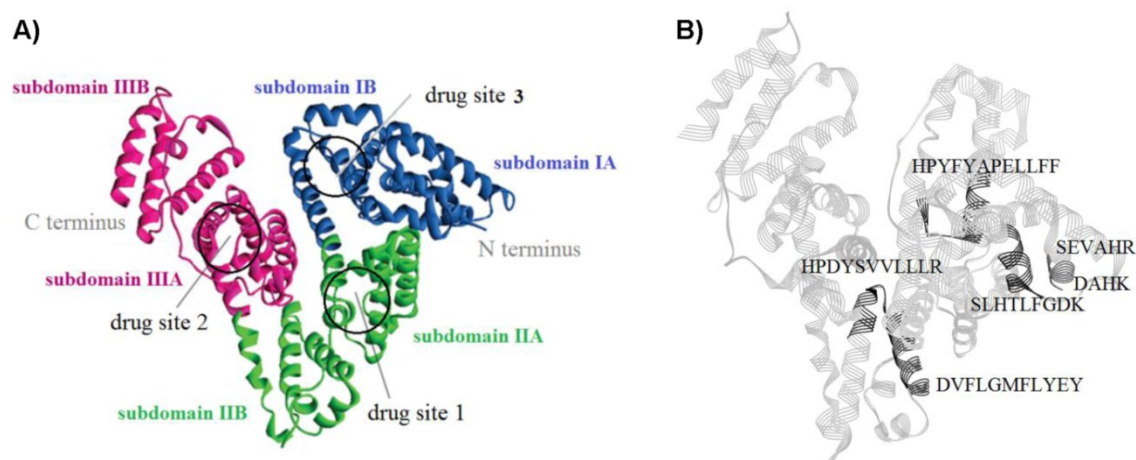

**Fig. S10.** HSA structure with major drug binding sites (A) and spatial localisation of MS-identified sequences for the binding of compounds [Ru(Cl-tpy)(en)Cl]<sup>+</sup>, [Ru(Cl-tpy)(dach)Cl]<sup>+</sup> and [Ru(Cl-tpy)(bipy)Cl]<sup>+</sup>.

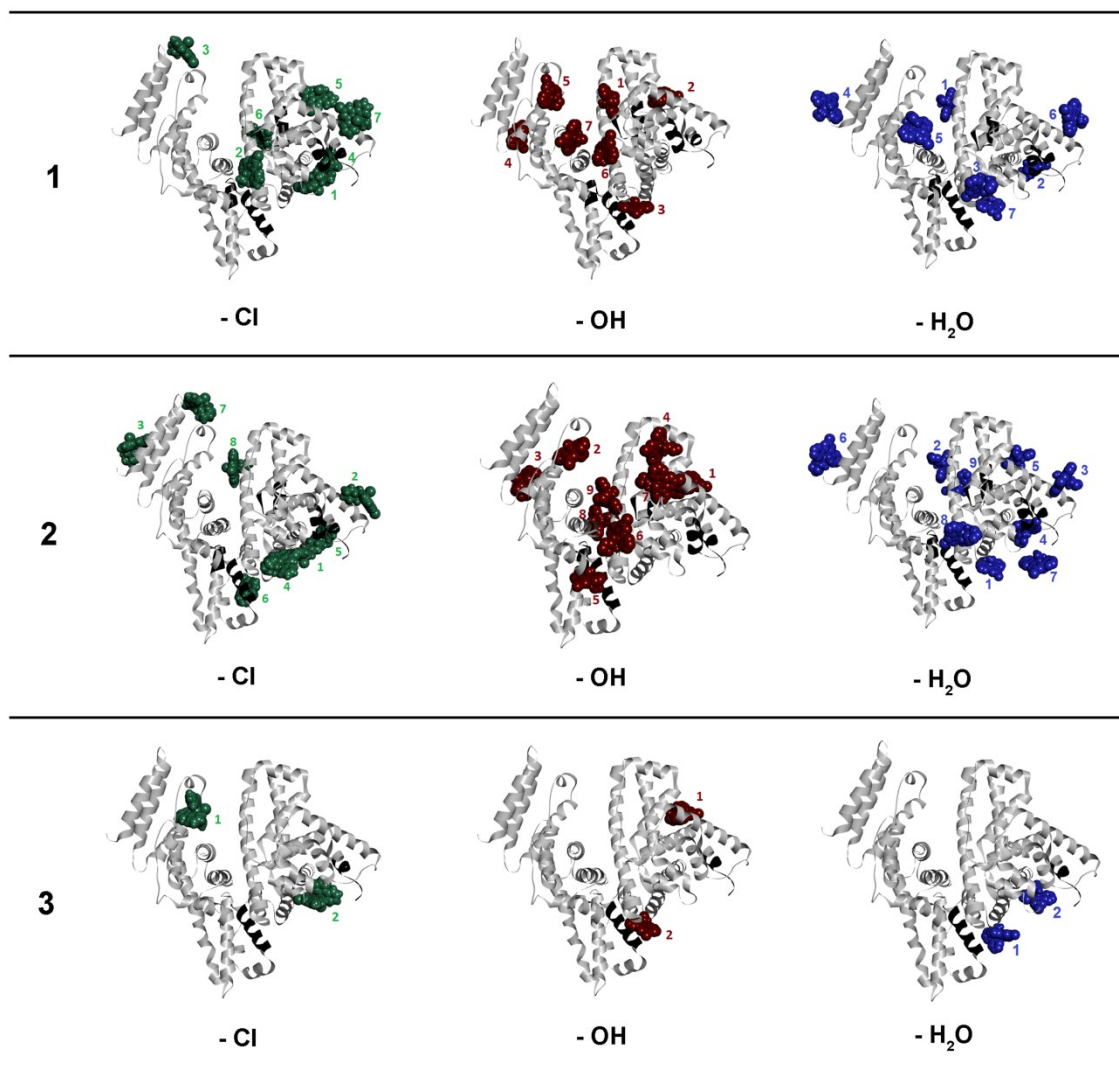

**Fig. S11.** HSA binding sites for chloro, hydroxo and aqua forms of compounds  $[\text{Ru}(\text{Cl-tpy})(\text{en})\text{Cl}]^+$ ,  $[\text{Ru}(\text{Cl-tpy})(\text{dach})\text{Cl}]^+$  and  $[\text{Ru}(\text{Cl-tpy})(\text{bipy})\text{Cl}]^+$ . Chloro forms are shown green, hydroxo red and aqua forms are shown blue. Target MS-identified HSA sequences are highlighted black.

**Table S3.** Binding energies of chloro, hydroxo and aqua forms of compounds  $[\text{Ru}(\text{Cl-tpy})(\text{en})\text{Cl}]^+$ ,  $[\text{Ru}(\text{Cl-tpy})(\text{dach})\text{Cl}]^+$  and  $[\text{Ru}(\text{Cl-tpy})(\text{bipy})\text{Cl}]^+$ , for each HSA binding site. Binding energies of chloro complexes that correspond to MS-identified sequences are highlighted green, while hydroxo complexes are marked red. The remaining binding energy values that most probably correspond to non-covalent interactions are black.

| Ru(II)<br>compound                        | Binding<br>site No | Binding energy (kcal/mol) |       |                   |
|-------------------------------------------|--------------------|---------------------------|-------|-------------------|
|                                           |                    | -Cl                       | -OH   | -H <sub>2</sub> O |
| <b>1</b><br><i>[RuL(4'-Cl-tpy)(en)]</i>   | 1                  | -8,12                     | -7,80 | -7,90             |
|                                           | 2                  | -7,27                     | -6,32 | -7,83             |
|                                           | 3                  | -7,22                     | -5,84 | -7,40             |
|                                           | 4                  | -7,09                     | -5,77 | -                 |
|                                           | 5                  | -6,99                     | -5,42 | -                 |
|                                           | 6                  | -6,83                     | -5,34 | -                 |
|                                           | 7                  | -6,74                     | -5,22 | -                 |
| <b>2</b><br><i>[RuL(4'-Cl-tpy)(dach)]</i> | 1                  | -9,14                     | -8,56 | -3,02             |
|                                           | 2                  | -8,67                     | -7,75 | -2,95             |
|                                           | 3                  | -8,53                     | -7,08 | -2,73             |
|                                           | 4                  | -8,53                     | -6,93 | -2,66             |
|                                           | 5                  | -8,38                     | -6,82 | -                 |
|                                           | 6                  | -8,37                     | -6,77 | -                 |
|                                           | 7                  | -7,46                     | -6,55 | -                 |
|                                           | 8                  | -7,18                     | -6,48 | -                 |
|                                           | 9                  | -                         | -6,47 | -                 |
| <b>3</b><br><i>[RuL(4'-Cl-tpy)(bipy)]</i> | 1                  | -7,97                     | -6,33 | -1,78             |
|                                           | 2                  | -6,98                     | -5,84 | -1,44             |
